# Supplementary material for: In-house homologous recombination deficiency testing in ovarian cancer: a multi-institutional Italian pilot study
Source: PubMed Central journal article supplement — J Clin Pathol. 2023 Apr 18;77(7):478–85. doi: 10.1136/jcp-2023-208852 (PMC11228191; doi:10.1136/jcp-2023-208852), 2023-04-18
Supplement: jcp-2023-208852supp001.pdf [file jcp-2023-208852supp001.pdf]

|              | Center#1 |               |                        | Center#2 |               |                        | Center#3 |               |                        |
|--------------|----------|---------------|------------------------|----------|---------------|------------------------|----------|---------------|------------------------|
|              | Reads    | Aligned Reads | Uniformity of coverage | Reads    | Aligned Reads | Uniformity of coverage | Reads    | Aligned Reads | Uniformity of coverage |
| <b>ID_1</b>  | 30342484 | 95.00%        | 100.00%                | 3151680  | 95.78%        | 96.43%                 | 43382964 | 96.98%        | 99.91%                 |
| <b>ID_2</b>  | 32051208 | 95.00%        | 100.00%                | 3009193  | 96.48%        | 95.60%                 | 42443652 | 96.34%        | 99.91%                 |
| <b>ID_3</b>  | 32257448 | 96.00%        | 100.00%                | 2280014  | 96.24%        | 96.56%                 | 40340238 | 95.99%        | 99.88%                 |
| <b>ID_4</b>  | 27997808 | 96.00%        | 100.00%                | 3083424  | 95.80%        | 94.46%                 | 43434872 | 96.41%        | 99.92%                 |
| <b>ID_5</b>  | 27929198 | 96.00%        | 100.00%                | 3346566  | 95.56%        | 94.80%                 | 38681522 | 96.65%        | 99.91%                 |
| <b>ID_6</b>  | 28519654 | 95.00%        | 100.00%                | 3025094  | 95.31%        | 96.08%                 | 39567014 | 96.85%        | 99.89%                 |
| <b>ID_7</b>  | 26566174 | 95.00%        | 100.00%                | 2614340  | 95.41%        | 95.88%                 | 36812004 | 96.85%        | 99.92%                 |
| <b>ID_8</b>  | 29026612 | 95.00%        | 100.00%                | 2160659  | 94.73%        | 96.15%                 | 38378622 | 97.30%        | 99.90%                 |
| <b>ID_9</b>  | 28976660 | 97.00%        | 100.00%                | 3240796  | 95.98%        | 97.30%                 | 41666208 | 96.80%        | 99.89%                 |
| <b>ID_10</b> | 29974484 | 96.00%        | 100.00%                | 3226484  | 96.54%        | 88.66%                 | NA       | NA            | NA                     |
| <b>ID_11</b> | 29498640 | 94.00%        | 100.00%                | 2987740  | 95.88%        | 96.13%                 | NA       | NA            | NA                     |
| <b>ID_12</b> | 26728516 | 95.00%        | 100.00%                | 3077696  | 96.44%        | 92.03%                 | 38811978 | 98.39%        | 99.90%                 |
| <b>ID_13</b> | 25679184 | 96.00%        | 100.00%                | 2944272  | 95.95%        | 93.21%                 | 37560378 | 98.15%        | 99.92%                 |
| <b>ID_14</b> | 28749864 | 95.00%        | 99.94%                 | 2980758  | 96.11%        | 97.57%                 | 29447798 | 96.22%        | 99.94%                 |
| <b>ID_15</b> | 25582666 | 95.00%        | 100.00%                | 2523669  | 94.45%        | 94.94%                 | 30959056 | 96.44%        | 99.92%                 |
| <b>ID_16</b> | 23514336 | 95.00%        | 100.00%                | 2175409  | 96.02%        | 91.01%                 | 31234964 | 96.20%        | 99.93%                 |
| <b>ID_17</b> | 24284426 | 95.00%        | 100.00%                | 2620747  | 95.85%        | 94.46%                 | 35129310 | 96.13%        | 99.94%                 |
| <b>ID_18</b> | 47376516 | 92.00%        | 98.59%                 | 2482504  | 96.20%        | 91.90%                 | NA       | NA            | NA                     |
| <b>ID_19</b> | 52442568 | 95.00%        | 100.00%                | 2657231  | 95.79%        | 97.43%                 | 34807102 | 98.33%        | 99.93%                 |
| <b>ID_20</b> | 47540742 | 93.00%        | 99.03%                 | 2584802  | 95.85%        | 94.09%                 | 36855122 | 98.05%        | 99.91%                 |
| <b>C</b>     | 25770988 | 95.00%        | 99.87%                 | 6985476  | 95.15%        | 98.31%                 | 34170392 | 98.10%        | 99.91%                 |

**Table x:** Technical parameters from NGS analysis of each tested sample by participating institutions.

Abbreviations: *C* (Control); *ID* (Identify Number); *NA* (Not Assessed).
