# Supplementary material for: In-house homologous recombination deficiency testing in ovarian cancer: a multi-institutional Italian pilot study
Source: PubMed Central journal article supplement — J Clin Pathol. 2023 Apr 18;77(7):478–85. doi: 10.1136/jcp-2023-208852 (PMC11228191; doi:10.1136/jcp-2023-208852), 2023-04-18
Supplement: jcp-2023-208852supp002.pdf [file jcp-2023-208852supp002.pdf]

| AMOY GS |          |          |
|---------|----------|----------|
|         | Center#1 | Center#3 |
| ID_1    | 85.10    | 77.70    |
| ID_2    | 97.40    | 98.70    |
| ID_3    | 91.50    | 92.70    |
| ID_4    | 84.30    | 88.30    |
| ID_5    | 10.70    | 17.10    |
| ID_6    | 3.30     | 4.10     |
| ID_7    | 13.30    | 11.80    |
| ID_8    | 5.00     | 7.20     |
| ID_9    | 35.40    | 19.00    |
| ID_10   | 90.40    | NA       |
| ID_11   | 99.20    | NA       |
| ID_12   | 7.80     | 6.50     |
| ID_13   | 99.20    | 99.30    |
| ID_14   | 7.90     | 7.90     |
| ID_15   | 0.80     | 0.70     |
| ID_16   | 87.90    | 89.70    |
| ID_17   | 37.10    | 50.10    |
| ID_18   | 7.00     | NA       |
| ID_19   | 98.80    | 97.20    |
| ID_20   | 19.30    | 19.30    |

**Supplementary Table 3:** Center#1 and Center#3 interlaboratory concordance on 20 HGSOc patients tested by adopting HRD focus panel assay (Amoy Diagnostics Co Ltd) for HRD evaluation. Concordant results (green) were also observed in 16 out of 17 tested samples. In a single instance (yellow) HRD positive score was detected.

Abbreviations: *GS* (Genomic Scar); *ID* (Identify Number); *NA* (Not Assessed).
