# Supplementary material for: In-house homologous recombination deficiency testing in ovarian cancer: a multi-institutional Italian pilot study
Source: PubMed Central journal article supplement — J Clin Pathol. 2023 Apr 18;77(7):478–85. doi: 10.1136/jcp-2023-208852 (PMC11228191; doi:10.1136/jcp-2023-208852), 2023-04-18
Supplement: jcp-2023-208852supp003.pdf [file jcp-2023-208852supp003.pdf]

| Center#1  |                       |             |            |          |
|-----------|-----------------------|-------------|------------|----------|
| Sample ID | BRCA                  | HRD Sophia  | GSS Myriad | GS AMOY  |
| ID_1      | WT                    | 3.4 POS     | 40 NEG     | POS 85.1 |
| ID_2      | BRCA1<br>p.S288Rfs*10 | 16.8 POS    | 60 POS     | POS 97.4 |
| ID_3      | WT                    | 5.3 POS     | 53 POS     | POS91.5  |
| ID_4      | WT                    | (-1.6) NEG  | 47 POS     | POS 84.3 |
| ID_5      | WT                    | (-3.3) NEG  | 28 NEG     | NEG 10.7 |
| ID_6      | WT                    | (-11.4) NEG | 3 NEG      | NEG 3.3  |
| ID_7      | WT                    | (-18.8) NEG | 18 NEG     | NEG 13.3 |
| ID_8      | WT                    | (-10.7) NEG | 16 NEG     | NEG 5    |
| ID_9      | WT                    | (-11) NEG   | 15 NEG     | NEG 35.4 |
| ID_10     | WT                    | (-1.4) NEG  | 23 NEG     | POS 90.4 |
| ID_11     | WT                    | 11.9 POS    | 75 POS     | POS 99.2 |
| ID_12     | WT                    | (-5.4) NEG  | 15 NEG     | NEG 7.8  |
| ID_13     | WT                    | 12.6 POS    | 56 POS     | POS 99.2 |
| ID_14     | WT                    | (-15.5) NEG | 9 NEG      | NEG 7.9  |
| ID_15     | WT                    | (-21.3) NEG | 2 NEG      | NEG 0.8  |
| ID_16     | WT                    | 14.9 POS    | 55 POS     | POS 87.9 |
| ID_17     | WT                    | (-5.7) NEG  | 34 NEG     | NEG 37.1 |
| ID_18     | WT                    | (-12.4) NEG | 19 NEG     | NEG 7    |
| ID_19     | WT                    | 8.1 POS     | 56 POS     | POS 98.8 |
| ID_20     | WT                    | (-9.6) NEG  | 25 NEG     | NEG 19.3 |

**Supplementary table 4:** Interlaboratory concordance on 20 HGSOc patients tested by adopting two commercially available NGS assays for HRD evaluation. HRD score was also compared with externalized approach (MyChoice® CDxMyriad HRD).

Abbreviations: *BRCA* (Breast Cancer Associated gene); *GSS* (Genomic Scar Score); *HRD* (Homologous Recombination Deficiency); *ID* (Identify Number); *NEG* (Negative); *POS* (Positive); *WT* (Wild-Type).
